# Supplementary material for: Holocene Hydroclimate in the Southeastern United States During Abrupt Climate Events: Evidence From New Speleothem Isotopic Records From Alabama
Source: Research Square preprint supplement (doi:10.21203/rs.3.rs-152650/v2), 2021-03-22
Supplement: Supplementary file 1 [file 812255aae71998cb845ac5c9.xlsx]

## Sheet: Readme
Precipitation amount and precipitation d18O data collected at the University of Alabama Tuscaloosa, United States.
References:
Dhungana, R., and Aharon, P., 2019, Stable isotopes and trace elements of drip waters at DeSoto Caverns during rainfall-contrasting years: Chemical Geology, v. 504, p. 96-104.
Lambert, J. W., and Aharon, P., 2010, Oxygen and hydrogen isotopes of rainfall and dripwater at SeSoto Caverns (Alabama, USA); Key to understanding past variability of moisture transport from the Gulf of Mexico: Geochimica Et Cosmochimica Acta, v. 74, no. 3, p. 846-861.
Note:
In order to calculate the expected mean annual d18O rainfall shift (10 year average) from a shift in 'winter' and 'summer' precipitation amount
go to "sensitivity test" sheet cells D145 and D146 and the result is shown in cell P146.
Note 1: values of cells D145 and D146 can be from 0< to 1 for a positive change or -1 to >0 for negative changes
maximum fractional changes of -1 or 1, correspond to 100% change in precipitation amount
Note 2= As an example you can assume stalagmite WE d18O shifts by -1 per mil during the YD cooling event.

## Sheet: sensitivity test
	Initial conditions	Precipitation amount shift	Initial conditions		Amount-weighted		Initial conditions	Summer	Spring				Final conditions	Initial conditions
Month-year	Rainfall (mm)		Rainfall d18O		(no amount effect)	Precipitation amount summer	Amount-weighed d18O	slope mean	slope mean					Annual amount-weighted d18O				Annual amount-weighed d18O		Isotope shift from initial to final conditions
2005-06-01	145.9	145.9	-6	0.243167	-5.92148	600	-5.92148	-0.008	-0.0053			0.0994614	-0.596769
2005-07-01	226.2	226.2	-6.9	0.377								0.154203	-1.064
2005-08-01	227.9	227.9	-4.9	0.379833								0.155362	-0.761272		summer=	0.409026	-2.42204
2005-09-01	75.2	75.2	-4.4	1								0.0512646	-0.225564			0.0512646	-0.225564
2005-10-01	8	8	-4.6									0.00545368	-0.0250869			0.00545368	-0.0250869
2005-11-01	55.1	55.1	-8.3									0.0375622	-0.311766			0.0375622	-0.311766
2005-12-01	99.7	99.7	-7.8									0.0679665	-0.530138			0.0679665	-0.530138
2006-01-01	155.6	155.6	-5.8									0.106074	-0.615229			0.106074	-0.615229
2006-02-01	166	166	-5.9									0.113164	-0.667667			0.113164	-0.667667
2006-03-01	123.3	123.3	-2.9	0.401237	-3.13163	307.3	-3.13163					0.0840548	-0.243759		Spring=	0.209489	-0.656043
2006-04-01	69.4	69.4	-3.1	0.225838								0.0473107	-0.146663																		-0.30189
2006-05-01	114.6	114.6	-3.4	0.372925							1466.9	0.0781239	-0.265621	-5.45353	1466.9			-5.45353		0
	1466.9			1
2006-06-01	31.4	31.4	-1.6	0.198107	-2.22454	158.5	-2.22454					0.0331678	-0.0530686
2006-07-01	88.6	88.6	-2.5	0.558991								0.0935883	-0.233971
2006-08-01	38.5	38.5	-2.1	0.242902								0.0406676	-0.0854019		summer=	0.167424	-0.372441
2006-09-01	125.3	125.3	-4.2	1								0.132354	-0.555889			0.132354	-0.555889
2006-10-01	186.4	186.4	-5									0.196894	-0.984472			0.196894	-0.984472
2006-11-01	112	112	-4.6									0.118306	-0.544206			0.118306	-0.544206
2006-12-01	132.7	132.7	-4.6									0.140171	-0.644787			0.140171	-0.644787
2007-01-01	82.2	82.2	-5.1									0.0868279	-0.442822			0.0868279	-0.442822
2007-02-01	51.4	51.4	-3.5									0.0542939	-0.190029			0.0542939	-0.190029
2007-03-01	22	22	-1.5	0.224033	-2.30041	98.2	-2.30041					0.0232386	-0.0348579		Spring=	0.103729	-0.238618
2007-04-01	64.2	64.2	-2.5	0.653768								0.0678145	-0.169536
2007-05-01	12	12	-2.7	0.1222							946.7	0.0126756	-0.0342241	-3.97327	946.7			-3.97327		0
	946.7
2007-06-01	29.2	29.2	-3.8	0.0891603	-3.43899	327.5	-3.43899					0.0244025	-0.0927294
2007-07-01	93.9	93.9	-4.5	0.286718								0.0784723	-0.353126
2007-08-01	204.4	204.4	-2.9	0.624122								0.170817	-0.49537		summer=	0.273692	-0.941225
2007-09-01	52.7	52.7	-5.6	1								0.0440415	-0.246632			0.0440415	-0.246632
2007-10-01	57.8	57.8	-5.2									0.0483035	-0.251178			0.0483035	-0.251178
2007-11-01	58.2	58.2	-5.4									0.0486378	-0.262644			0.0486378	-0.262644
2007-12-01	67.2	67.2	-4.9									0.0561591	-0.27518			0.0561591	-0.27518
2008-01-01	127.6	127.6	-5.1									0.106635	-0.543841			0.106635	-0.543841
2008-02-01	128.7	128.7	-5									0.107555	-0.537774			0.107555	-0.537774
2008-03-01	112.4	112.4	-3.6	0.298222	-3.86278	376.9	-3.86278					0.0939328	-0.338158		Spring=	0.314976	-1.21668
2008-04-01	123.8	123.8	-4.4	0.328469								0.10346	-0.455223
2008-05-01	140.7	140.7	-3.6	0.373309							1196.6	0.117583	-0.423299	-4.27515	1196.6			-4.27515		0
	1196.6
2008-06-01	101.1	101.1	-3.3	0.284308	-4.99722	355.6	-4.99722					0.0659431	-0.217612
2008-07-01	73.4	73.4	-1.9	0.206412								0.0478756	-0.0909636
2008-08-01	181.1	181.1	-7.2	0.50928								0.118124	-0.85049		summer=	0.231942	-1.15907
2008-09-01	33.8	33.8	-2.5	1								0.0220463	-0.0551156			0.0220463	-0.0551156
2008-10-01	67.74	67.74	-6.4									0.0441838	-0.282777			0.0441838	-0.282777
2008-11-01	79.2	79.2	-4.4									0.0516587	-0.227298			0.0516587	-0.227298
2008-12-01	156	156	-5.4									0.101752	-0.549461			0.101752	-0.549461
2009-01-01	144.4	144.4	-4.5									0.0941858	-0.423836			0.0941858	-0.423836
2009-02-01	189.6	189.6	-4.7									0.123668	-0.581239			0.123668	-0.581239
2009-03-01	217.4	217.4	-4.9	0.428966	-4.39795	506.8	-4.39795					0.1418	-0.694822		Spring =	0.330563	-1.4538
2009-04-01	101	101	-3.5	0.19929								0.0658779	-0.230573
2009-05-01	188.4	188.4	-4.3	0.371744							1533.14	0.122885	-0.528406	-4.73259	1533.14			-4.73259		0
2009-06-01	37.8	37.8	-3.2	0.106389	-3.69643	355.3	-3.69643					0.0234114	-0.0749164
2009-07-01	156.8	156.8	-3.3	0.441317								0.0971138	-0.320476
2009-08-01	160.7	160.7	-4.2	0.452294								0.0995293	-0.418023		summer=	0.220055	-0.813415
2009-09-01	202.5	202.5	-6.3	1								0.125418	-0.790134			0.125418	-0.790134
2009-10-01	177	177	-4.5									0.109625	-0.493311			0.109625	-0.493311
2009-11-01	112.8	112.8	-11.4									0.0698625	-0.796433			0.0698625	-0.796433
2009-12-01	165.8	165.8	-8.1									0.102688	-0.831773			0.102688	-0.831773
2010-01-01	119	119	-5.9									0.0737025	-0.434845			0.0737025	-0.434845
2010-02-01	84.2	84.2	-8.8									0.0521491	-0.458912			0.0521491	-0.458912
2010-03-01	144	144	-6.9	0.361809	-5.26709	398	-5.26709					0.0891862	-0.615385		Spring =	0.246501	-1.29834
2010-04-01	80.6	80.6	-4	0.202513								0.0499195	-0.199678
2010-05-01	173.4	173.4	-4.5	0.435678							1614.6	0.107395	-0.483278	-5.91716	1614.6			-5.91716		0
2010-06-01	150.4	150.4	-3.6	0.365049	-4.83379	412	-4.83379					0.115391	-0.415406
2010-07-01	149.4	149.4	-5.2	0.362621								0.114623	-0.596041
2010-08-01	112.2	112.2	-6	0.27233								0.0860826	-0.516495			0.316096	-1.52794
2010-09-01	38.8	38.8	-6	1								0.0297683	-0.17861			0.0297683	-0.17861
2010-10-01	52.4	52.4	-6									0.0402025	-0.241215			0.0402025	-0.241215
2010-11-01	160.8	160.8	-5.1									0.12337	-0.629185			0.12337	-0.629185
2010-12-01	28.8	28.8	-5.9									0.0220961	-0.130367			0.0220961	-0.130367
2011-01-01	98.2	98.2	-5.8									0.0753414	-0.43698			0.0753414	-0.43698
2011-02-01	71.2	71.2	-5.5									0.0546264	-0.300445			0.0546264	-0.300445
2011-03-01	206.2	206.2	-5.8	0.467362	-4.52987	441.2	-4.52987					0.158202	-0.917569		Spring =	0.338499	-1.53336
2011-04-01	198.8	198.8	-3.4	0.450589								0.152524	-0.518582
2011-05-01	36.2	36.2	-3.5	0.082049							1303.4	0.0277735	-0.0972073	-4.9781	1303.4			-4.9781		0
2011-06-01	22.8	22.8	-5.1	0.128234	-1.6757	177.8	-1.6757					0.0172088	-0.0877651
2011-07-01	130.2	130.2	-1.3	0.732283								0.0982716	-0.127753
2011-08-01	24.8	24.8	-0.5	0.139483								0.0187184	-0.0093592			0.134199	-0.224877
2011-09-01	280.5	280.5	-8.9	1								0.211714	-1.88426			0.211714	-1.88426
2011-10-01	10.2	10.2	-4									0.00769869	-0.0307948			0.00769869	-0.0307948
2011-11-01	105.8	105.8	-4.6									0.0798551	-0.367333			0.0798551	-0.367333
2011-12-01	138.6	138.6	-4.7									0.104612	-0.491675			0.104612	-0.491675
2012-01-01	152.7	152.7	-4.2									0.115254	-0.484067			0.115254	-0.484067
2012-02-01	170.3	170.3	-5.4					slope mean				0.128538	-0.694105			0.128538	-0.694105
2012-03-01	123.3	123.3	-4.9	0.426644	-4.54211	289	-4.54211	-0.0053				0.0930636	-0.456012		Spring =	0.21813	-0.990769
2012-04-01	15.8	15.8	-1.2	0.0546713								0.0119254	-0.0143105
2012-05-01	149.9	149.9	-4.6	0.518685							1324.9	0.113141	-0.520447	-5.16788	1324.9			-5.16788		0
2012-06-01	34.4	34.4	-6.2	0.137052	-3.27912	251	-3.27912					0.0230347	-0.142815
2012-07-01	77.1	77.1	-2.3	0.307171								0.0516272	-0.118742
2012-08-01	139.5	139.5	-3.1	0.555777								0.093411	-0.289574		summer=	0.168073	-0.551132
2012-09-01	201.5	201.5	-4.2	1								0.134927	-0.566693			0.134927	-0.566693
2012-10-01	76.8	76.8	-4.9									0.0514263	-0.251989			0.0514263	-0.251989
2012-11-01	32	32	-5.7									0.0214276	-0.122137			0.0214276	-0.122137
2012-12-01	231.6	231.6	-5.9									0.155082	-0.914986			0.155082	-0.914986
2013-01-01	208.3	208.3	-3.9									0.13948	-0.543973			0.13948	-0.543973
2013-02-01	168.4	168.4	-3.9									0.112763	-0.439775			0.112763	-0.439775
2013-03-01	145.1	145.1	-3.6	0.448116	-4.00528	323.8	-4.00528					0.0971608	-0.349779		Spring =	0.216821	-0.868428
2013-04-01	141.7	141.7	-4.5	0.437616								0.0948842	-0.426979
2013-05-01	37	37	-3.7	0.114268							1493.4	0.0247757	-0.09167	-4.25911	1493.4			-4.25911		0
2013-06-01	217.6	217.6	-6	0.427925	-4.65923	508.5	-4.65923					0.142148	-0.852887
2013-07-01	133.6	133.6	-4.9	0.262734								0.0872746	-0.427646
2013-08-01	157.3	157.3	-2.6	0.309341								0.102757	-0.267167		summer=	0.332179	-1.5477
2013-09-01	46.5	46.5	-6.1	1								0.0303763	-0.185295			0.0303763	-0.185295
2013-10-01	40.7	40.7	-3.2									0.0265874	-0.0850797			0.0265874	-0.0850797
2013-11-01	88.8	88.8	-6.4									0.0580089	-0.371257			0.0580089	-0.371257
2013-12-01	220.6	220.6	-4.7									0.144108	-0.677306			0.144108	-0.677306
2014-01-01	52.1	52.1	-6.3									0.0340345	-0.214417			0.0340345	-0.214417
2014-02-01	125.5	125.5	-5									0.0819833	-0.409916			0.0819833	-0.409916
2014-03-01	130.9	130.9	-5.4	0.292122	-4.0528	448.1	-4.0528					0.0855108	-0.461759		Spring =	0.292723	-1.18635
2014-04-01	276.3	276.3	-3.6	0.616603								0.180494	-0.649778
2014-05-01	40.9	40.9	-2.8	0.0912743							1530.8	0.0267181	-0.0748106	-4.67732	1530.8			-4.67732		0
2014-06-01	87.3	87.3	-4.3	0.447005	-3.36851	195.3	-3.36851					0.0665498	-0.286164
2014-07-01	19.2	19.2	-5	0.0983103								0.0146364	-0.0731819
2014-08-01	88.8	88.8	-2.1	0.454685								0.0676932	-0.142156		summer=	0.148879	-0.501502
2014-09-01	38.2	38.2	-3.9	1								0.0291203	-0.113569			0.0291203	-0.113569
2014-10-01	83.5	83.5	-4.8									0.063653	-0.305534			0.063653	-0.305534
2014-11-01	119.7	119.7	-7.4									0.0912487	-0.67524			0.0912487	-0.67524
2014-12-01	191.3	191.3	-6.4									0.14583	-0.933313			0.14583	-0.933313
2015-01-01	173.2	173.2	-6.2									0.132032	-0.8186			0.132032	-0.8186
2015-02-01	128.6	128.6	-6.5									0.0980332	-0.637216			0.0980332	-0.637216
2015-03-01	121.4	121.4	-3.7	0.317801	-4.1455	382	-4.1455					0.0925446	-0.342415		Spring =	0.291203	-1.20718
2015-04-01	178.4	178.4	-4.7	0.467016								0.135996	-0.639183
2015-05-01	82.2	82.2	-3.6	0.215183							1311.8	0.062662	-0.225583	-5.19216	1311.8			-5.19216		0
			Shift precipitation here (cells below)
	winter'	fractional change	0
	summer'	Fractional change	0												0	Mean rainfall annual d18O shift (10-year average) result
winter' corresponds to the months from October to March
summer' corresponds to the months from April to September
Note 1: values can be from 0< to 1 for a positive change or -1 to >0 for negative changes
maximum fractional changes of -1 or 1, correspond to 100% change in precipitation amount
Note 2= Stalagmite WE d18O shifts by -1 per mil during the YD cooling event.
