# Supplementary material for: Holocene Hydroclimate in the Southeastern United States During Abrupt Climate Events: Evidence From New Speleothem Isotopic Records From Alabama
Source: Research Square preprint supplement (doi:10.21203/rs.3.rs-152650/v2), 2021-03-22
Supplement: Supplementary file 2 [file d0dd905f5ec60e995efac689.xlsx]

## Sheet: Sheet1
Table S1. U-Th results.
Sample ID	Description	238U	± (2σ)	232Th	± (2σ)	δ234U	± (2σ)	(230Th/238U)	± (2σ)	230Th/232Th	± (2σ)	Age (yr)	± (2σ)	Age (yr)	± (2σ)	δ234U initial	± (2σ)	Age (yr BP)	± (2σ)
	mm from top	(ng/g)a		(pg/g)a		(per mil)b		activity		ppm atomic		(uncorrected)c		(corrected)d		(per mil)e		(corrected)f
WE-13	1.64	5873.62	117.477	5818.71	117.292	397	2.13775	0.00516241	0.000101193	82.7389	1.62709	403.482	7.94689	382.066	13.3342	397.867	2.14036	313.8	13.3
WE-5	14.96	5143.77	102.884	5807.56	116.964	387.242	1.92046	0.0173472	0.000104877	243.946	1.51512	1371.42	8.55579	1346.85	14.9679	388.717	1.92738	1279.4	15
WE-16	20	4742.79	94.8558	6063.37	140.941	380.496	2.00232	0.0307561	0.000287958	381.97	5.72241	2454.51	23.4975	2426.58	27.331	383.111	2.01597	2357.8	27.3
WE-17	27.4	7308.9	146.178	1506.22	70.7291	374.825	1.67606	0.0341509	0.000251735	2631.13	113.347	2740	20.7108	2735.48	20.8329	377.73	1.68913	2666.7	20.8
WE-18	30	2775.26	55.5068	48920.6	982.967	337.502	2.37272	0.0484471	0.000664949	43.6373	0.599055	4017.3	56.5563	3619.06	207.358	340.967	2.40565	3549.5	207.4
WE-14	33	5641.03	112.844	2750.65	58.689	323.881	3.98145	0.0521392	0.000238036	1697.72	14.2581	4374.7	24.399	4363.61	25.0041	327.894	4.03039	4295.2	25
WE-6	54.82	8479.93	169.645	8435.27	169.718	290.102	2.83145	0.0600071	0.000211449	957.798	3.40263	5185.09	22.0422	5161.87	24.891	294.359	2.87262	5093.5	24.9
WE-15	73.5	11248.6	225.152	1090.6	27.678	298.126	3.87409	0.0624313	0.000230944	10223.8	162.46	5365.1	26.151	5362.85	26.1709	302.672	3.93314	5294.5	26.2
WE-7	87.56	5216.7	104.335	6561.09	132.051	311.647	1.85106	0.0692431	0.000313681	874.125	4.09628	5902.14	28.7348	5873.28	32.1461	316.856	1.88216	5805	32.1
WE-4	103.8	7791.02	156.161	2383.35	47.9765	355.38	2.06234	0.0837295	0.000254659	4345.73	13.9825	6935.05	24.3218	6928.26	24.5528	362.397	2.10286	6860.8	24.6
WE-8	133.15	10272.3	205.464	3639.82	74.9702	404.248	1.74134	0.10054	0.000404211	4505.1	27.1745	8073.54	35.1628	8065.97	35.3636	413.555	1.78156	7997.7	35.4
WE-19	151	8227.64	164.584	3834	77.3156	398.245	2.20356	0.101466	0.000376454	3457.18	14.1414	8187	34.2006	8177	34.5586	407.542	2.2558	8107.5	34.6
WE-20	170	7282.2	145.766	15578.3	312.244	405.589	2.53145	0.105572	0.000353105	783.553	2.32953	8483.82	33.4583	8438.13	40.4827	415.363	2.59243	8368.6	40.5
WE-9	189.68	7070.74	141.428	8396.71	169.308	404.242	2.53862	0.106186	0.000426546	1419.71	6.09643	8543.51	39.0666	8518.13	41.059	414.077	2.60122	8449.8	41.1
WE-21	205	8999.38	180.307	650.768	14.7431	404.078	2.45895	0.115722	0.000398549	25408.5	279.443	9342.58	37.6144	9341.04	37.6211	414.872	2.52507	9271.5	37.6
WE-22	222	9092.42	182.403	1568.2	32.2486	405.197	3.04838	0.116507	0.000377524	10725.3	57.3315	9400.65	38.2433	9396.97	38.2831	416.086	3.13023	9327.4	38.3
WE-10	237.72	10048.6	200.973	6698.76	135.507	404.635	1.65847	0.116772	0.000425545	2781.17	12.1003	9426.85	37.6028	9412.62	38.2655	415.527	1.70322	9344.3	38.3
WE-3	245.13	9099.28	182.077	21295.4	438.172	404.021	1.51722	0.117806	0.000691894	799.221	5.88374	9518.1	59.1768	9468.11	64.2349	414.962	1.55989	9400.6	64.2
Hiatus
WE-2	249.32	5893.15	117.889	54395.4	1100.57	408.525	2.08138	0.136072	0.000584669	234.063	1.15086	11026.6	52.5381	10830.2	111.425	421.204	2.14967	10762.7	111.4
WE-11	263.8	6470	129.4	15353.4	308.439	416.355	1.87741	0.138287	0.000563755	925.25	3.77594	11149	50.135	11098.9	56.0466	429.602	1.93791	11030.6	56
WE-12	298.9	10561.8	211.236	48994	982.14	442.446	1.76313	0.147803	0.000551011	505.888	1.76609	11726	48.3679	11629.7	68.2187	457.208	1.82395	11561.4	68.2
WE-1	334.54	10314.5	206.538	8307.42	167.998	419.087	2.00418	0.150501	0.000656004	2966.88	14.5598	12160.4	58.7012	12143.4	59.3052	433.698	2.07514	12076	59.3
Notes:
aReported errors for 238U and 232Th concentrations are estimated to be ±1% due to uncertainties in spike concentration; analytical uncertainties are smaller.
bd234U = ([234U/238U]activity - 1) x 1000.
c[230Th/238U]activity = 1 - e-l230T + (d234Umeasured/1000)[l230/(l230 - l234)](1 - e-(l230 - l234) T), where T is the age. "Uncorrected" indicates that no correction has been made for initial 230Th.
dAges are corrected for detrital 230Th assuming an initial 230Th/232Th of (4.2±2.2) x 10-6.
ed234Uinitial corrected was calculated based on 230Th age (T), i.e., d234Uinitial = d234Umeasured X el234*T, and T is corrected age.
fB.P. stands for “Before Present” where the “Present” is defined as the January 1, 1950 C.E.
Decay constants for 230Th and 234U are from Cheng et al. (2013); decay constant for 238U is 1.55125 x 10-10 yr-1 (Jaffey et al., 1971).
